# Supplementary material for: Synthesis, Regulation and Degradation of Carotenoids Under Low Level UV-B Radiation in the Filamentous Cyanobacterium Chlorogloeopsis fritschii PCC 6912
Source: PubMed Central journal article supplement (PMC7029182; doi:10.3389/fmicb.2020.00163), 2020-02-12
Supplement: Image_2.pdf [file Image_2.pdf]

Supplementary Figure S2

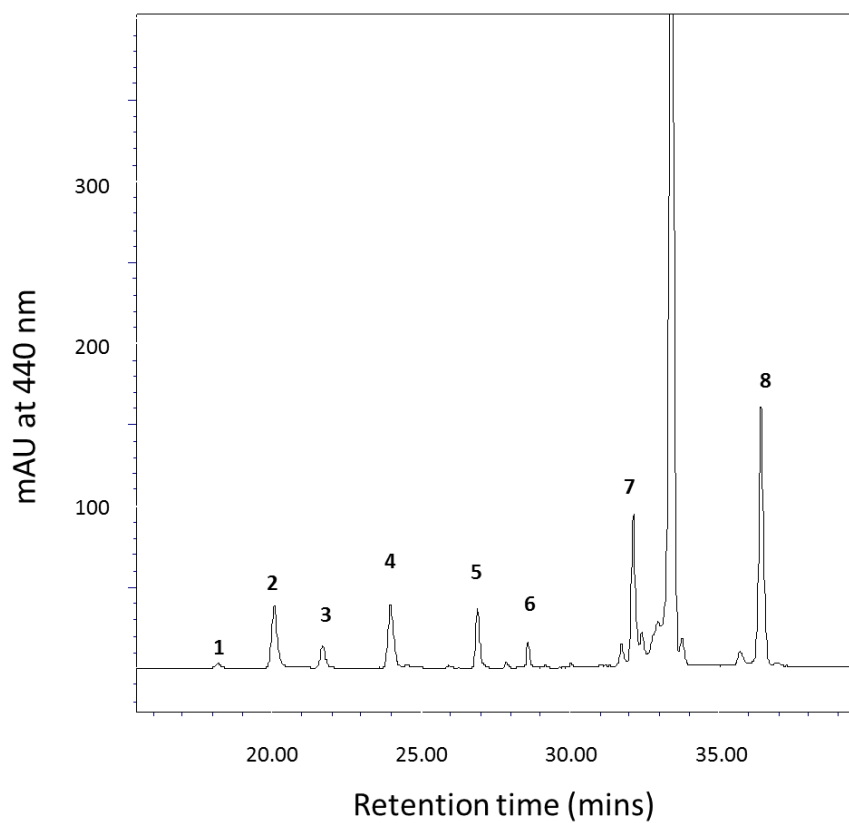

Figure S2: HPLC chromatogram of *C. fritschii* PCC 6912. Refer to Table S1 for details.
